# Supplementary material for: Flexibility of Oxidized and Reduced States of the Chloroplast Regulatory Protein CP12 in Isolation and in Cell Extracts
Source: MDPI journal article supplement (doi:10.3390/biom11050701), 2021-05-08
Supplement: s1 [file s1]

## Supplementary materials

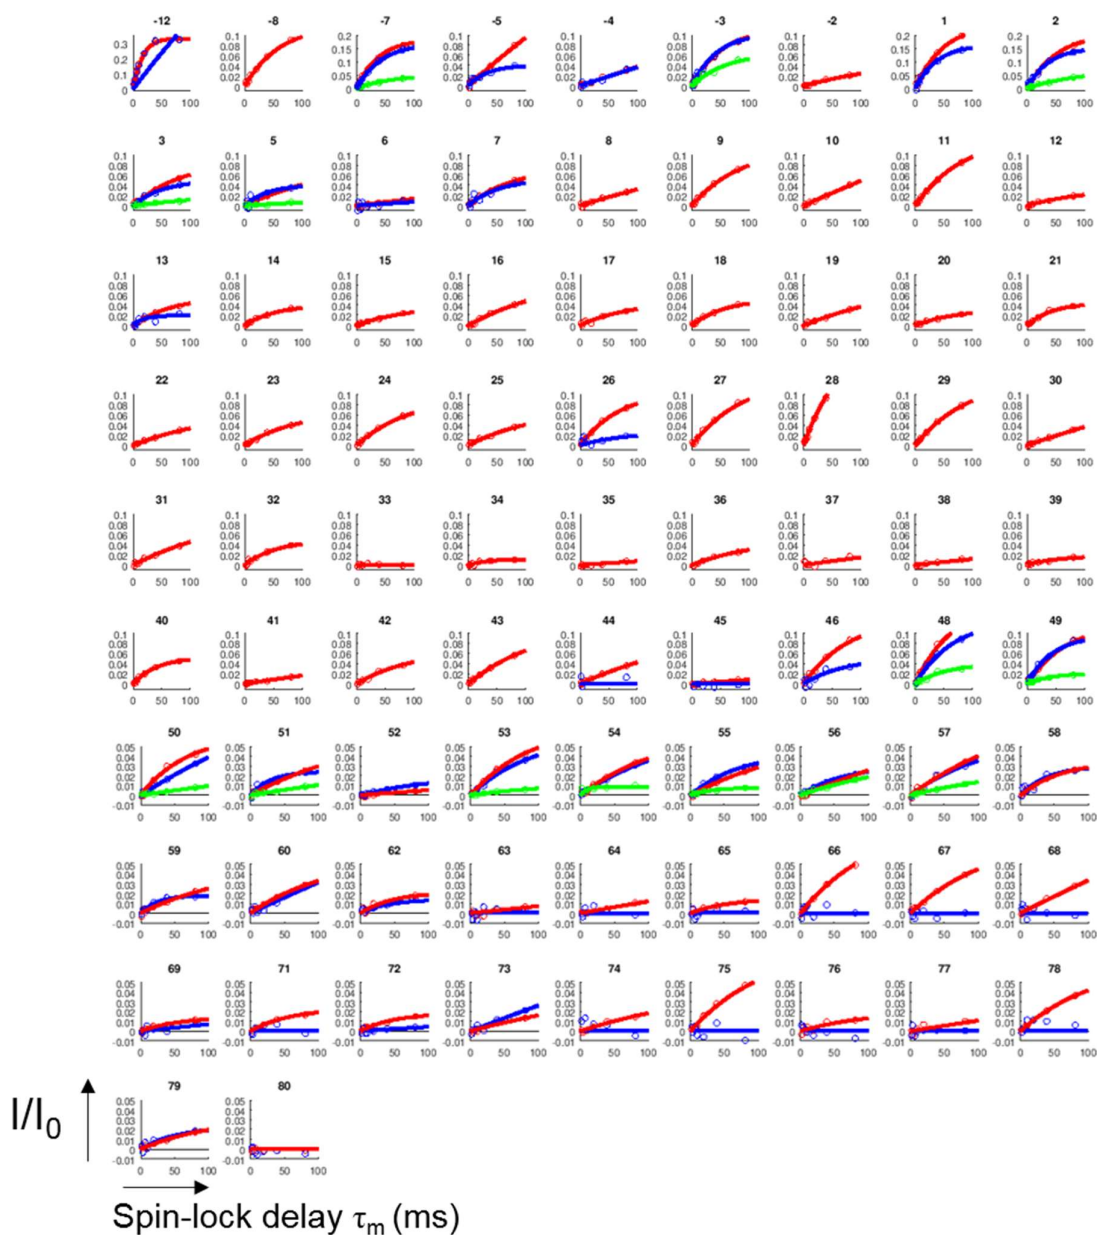

**Figure S1.** The signal intensity as a function of the spin-lock delay in the CLEANEX-PM experiments for CP12<sub>red</sub> at pH 7 (red), CP12<sub>ox</sub> at pH 7 (blue), CP12<sub>ox</sub> at pH 6 (green) for all CP12 residues. The fits are performed as indicated in the Material and Methods section. The number on each plot from 1 to 80 corresponds to the start (S) and to the end (D) of the amino acid sequence of the mature protein. For CP12<sub>ox</sub>, all rates at pH 6 are significantly lower than those at pH 7, indicating that the exchange falls in the EX2 regime. This allows the determination of  $\Delta G$  of folding.

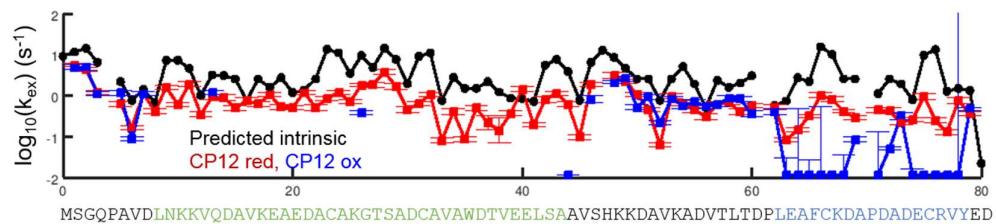

**Figure S2.** Solvent-amine intrinsic proton exchange rates calculated using Sphere (black) and solvent-amide proton exchange rates measured using CLEANEX-PM experiment on CP12<sub>red</sub> (red) and on CP12<sub>ox</sub> (blue).

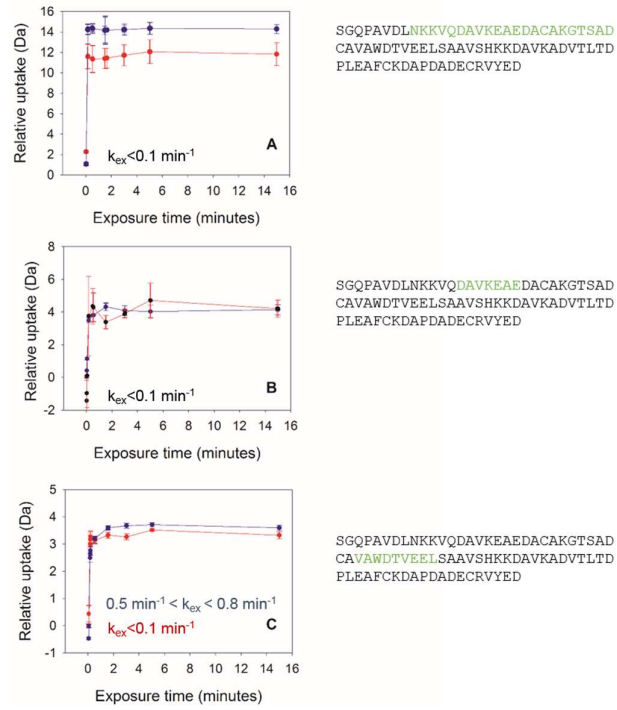

**Figure S3.** Relative uptake in mass of three peptides corresponding to the N-terminal region upon mixing with Deuterium of CP12<sub>red</sub> (red) and CP12<sub>ox</sub> (blue). The very rapid increase in mass confirms the dynamic nature of this region. The peptides are highlighted in green next to the corresponding graph.

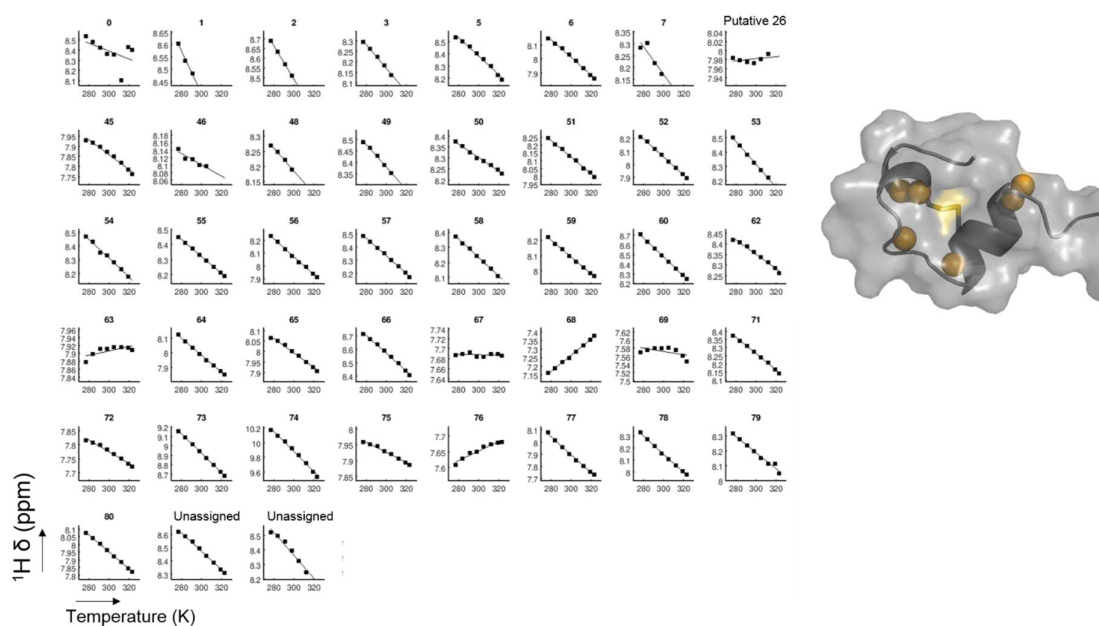

**Figure S4.** Temperature dependence of the proton chemical shift for the amine proton of all CP12<sub>ox</sub> residues. The fits are performed as indicated in the Material and Methods section. The structure on the right is that of the CP12<sub>ox</sub> C-terminal helical turn, with the amide protons that have a non-linear temperature dependence of their chemical shift highlighted in orange. This indicates that the N-terminal interconversion influences the C-terminal residues chemical shifts. The number on each plot corresponds to the amino acid position on the sequence of the protein.

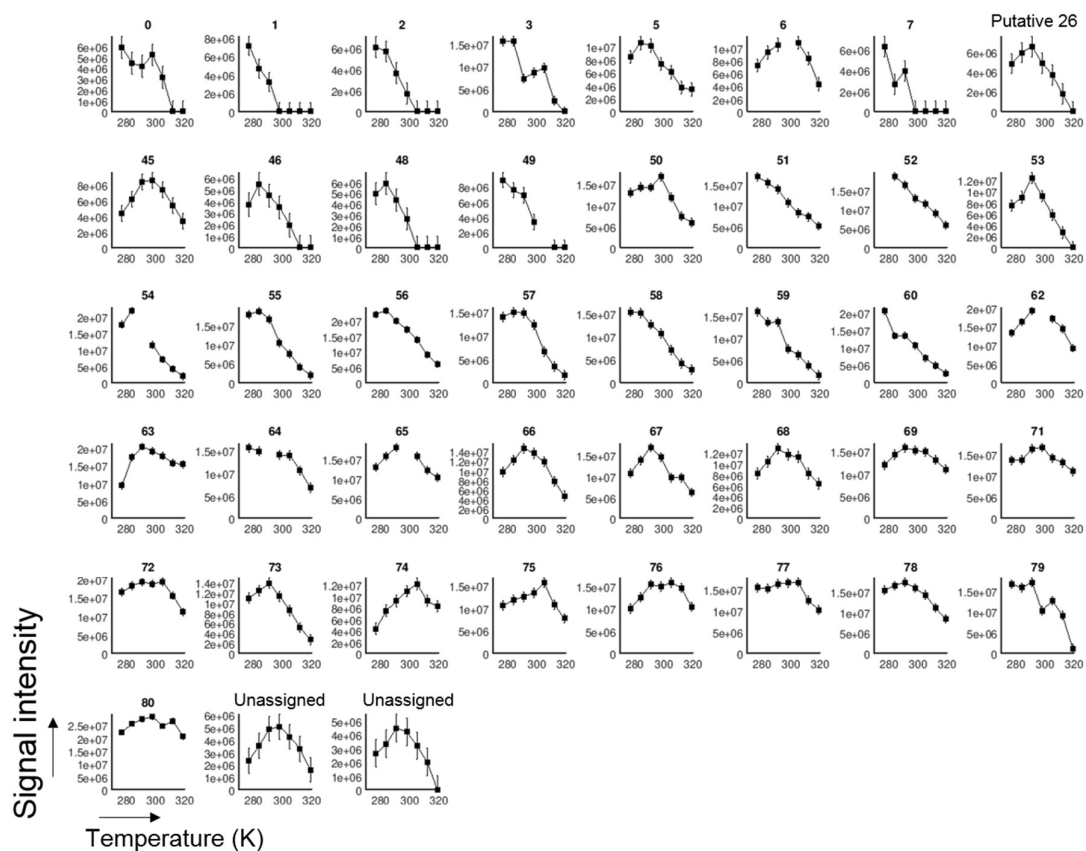

**Figure S5.** The temperature dependence of the  $^1\text{H}$ - $^{15}\text{N}$  signal intensity for the resonances of all CP12 $\alpha$  residues. The number on each plot corresponds to the amino acid position on the sequence of the protein.

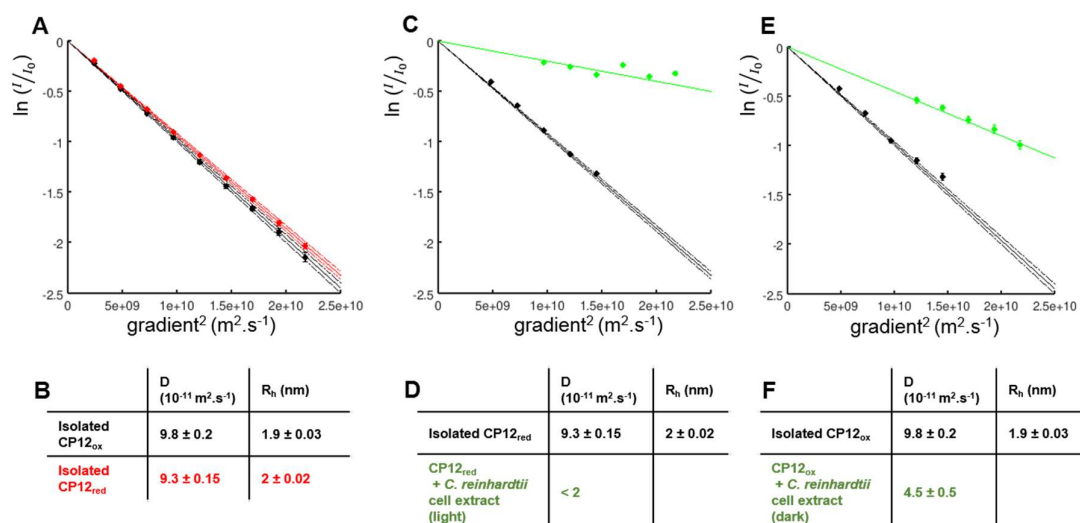

**Figure S6. Hydrodynamics of CP12<sub>ox</sub> and CP12<sub>red</sub> measured by DOSY-NMR.** A: STE on isolated CP12<sub>ox</sub> (black) and CP12<sub>red</sub> (red). C: XSTE on CP12<sub>red</sub> isolated (black) and in the presence of cell extract (green). E: XSTE on CP12<sub>ox</sub> isolated (black) and in the presence of cell extract (green). On the graphs A, C and E: the x-axis is the square of the gradient strength and on the y axis is the normalized intensity on a ln scale (refer to Material and Methods section). A linear dependency indicates a homogenous monomeric state of the protein. The tables of B, D and F show the measured diffusion coefficient from the data shown in A, C and E respectively, as well as the hydrodynamic radius for isolated CP12.

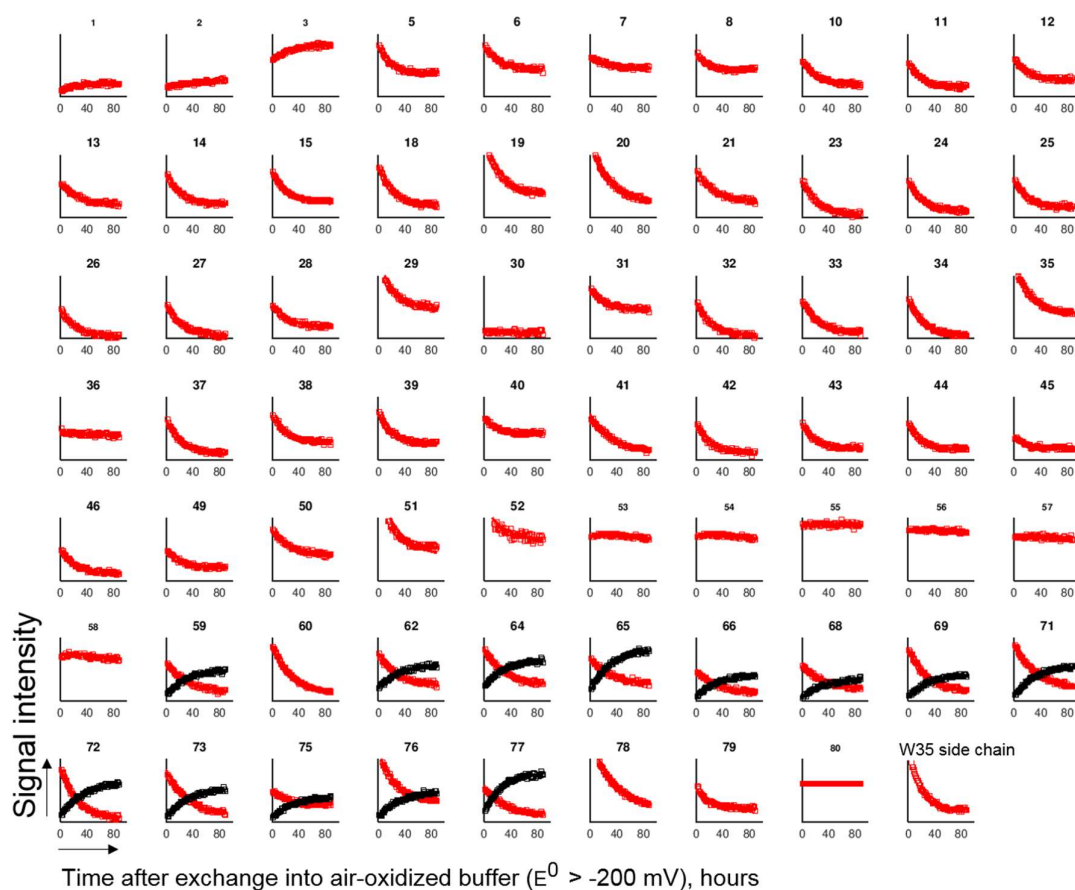

**Figure S7. Real time monitoring of the oxidation for all CP12 residues.** Red: Intensities of resonances of CP12<sub>red</sub>. Black: Intensities of resonances of CP12<sub>ox</sub>.

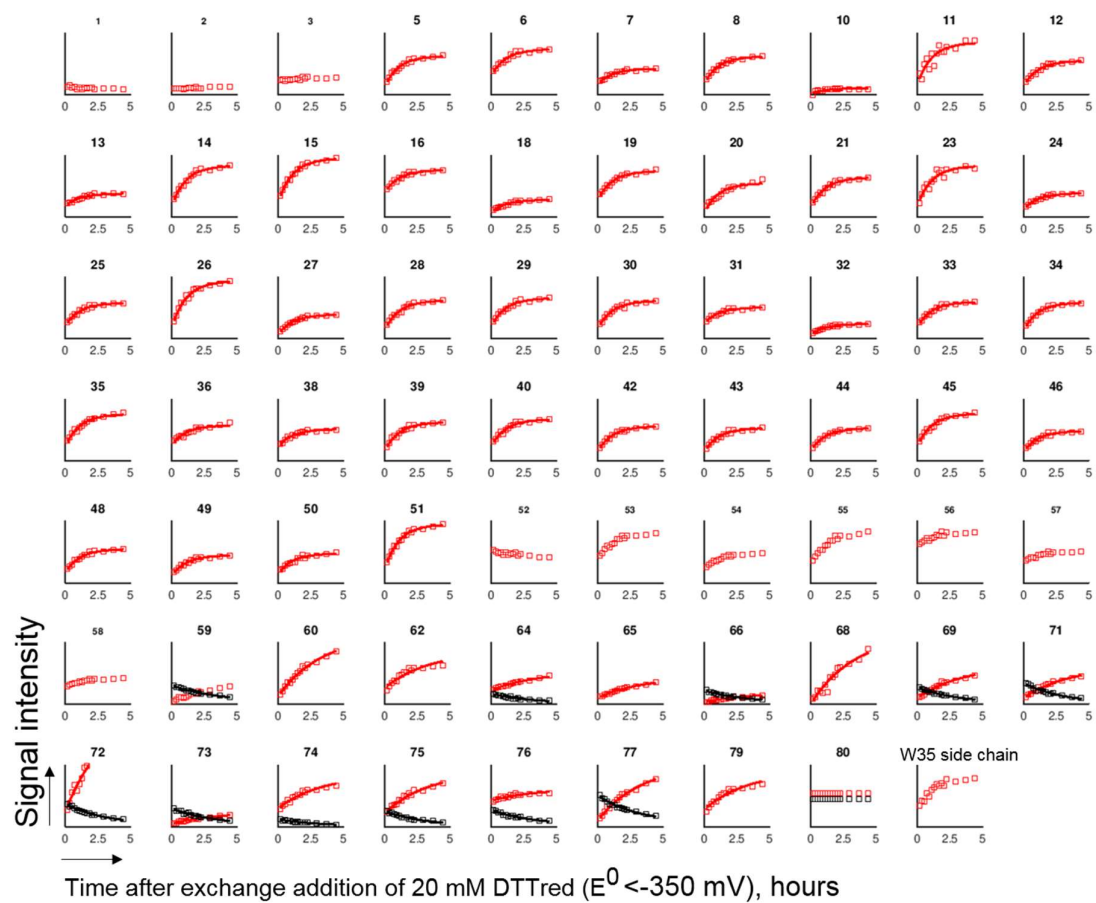

**Figure S8.** Real-time monitoring of the reduction for all CP12 residues. Red: Intensities of resonances of CP12<sub>red</sub>. Black: Intensities of resonances of CP12<sub>ox</sub>.
